# Supplementary material
Source: Research Square preprint supplement (doi:10.21203/rs.3.rs-9434261/v1)
Supplement: Supplementary file 1 [file f3da766312b061ca7840d9b7.docx]

# Supplemental table 1

# Primer sequences for quantitative real-time PCR

| **Gene** | **Primer sequence** |
| --- | --- |
| Gapdh | F: 5’-AGGTCGGTGTGAACGGATTTG-3’  R: 5’-TGTAGACCATGTAGTTGAGGTCA-3’ |
| Ddx3y | F: 5’-GTGCTCAAACAGGGTCTGGA-3’  R: 5’-AAGCCTCTCCTGGACCATCT-3’ |
| Eif2s3y | F: 5’-GAGAAGCCGGTGTCACTCTC-3’  R: 5’-TCACGTGAAAGCGGAGTCAA-3’ |
| Kdm5d | F: 5’AATTCTGGAGGCTGGTGAGC--3’  R: 5’-ACAGGAAACCCACTGCCAAA-3’ |
| Uty | F: 5’-AGCGTGCAGGAGTCTAGGTA-3’  R: 5’-ATGGCGAAGTTGGTGGTCTT-3’ |

# Supplemental table 2

# Maker Gene

| **Classification** | **Cluster** | **Subtype** | **Marker gene** |
| --- | --- | --- | --- |
| Neurons | 1 | Inhibitory Neurons | Gad2, Slc32a1 |
| 4 | Inhibitory Neurons | Gad2, Slc32a1, Drd1 |
| 5 | Excitatory Neurons | Camk2a |
| 6 | Inhibitory Neurons | Reln, Drd2, Adora2a |
| 7 | Excitatory Neurons | Slc17a7 |
| 8 | Excitatory Neurons | Camk2a |
| 9 | Excitatory Neurons | Gria3, Camk2a |
| 10 | Excitatory Neurons | Slc17a7 |
| 12 | Inhibitory Neurons | Gad1, Gad2, Slc6a1, Slc32a1, Pvalb |
| 13 | Inhibitory Neurons | Gad1, Gad2, Slc32a1 |
| 14 | Excitatory Neurons | Slc17a6, Slc17a7, Camk2a |
| 16 | Inhibitory Neurons | Reln, Sst, Gad2, Slc32a1 |
| 17 | Excitatory Neurons | Slc17a7 |
| 18 | Inhibitory Neurons | Gad2, Slc32a1 |
| 19 | Excitatory Neurons | Slc17a7, Camk2a, Grin2a, Grin2b, Gria1 |
| 20 | Excitatory Neurons | Slc17a7, Gria4 |
| 22 | Inhibitory Neurons | Reln, Vip, Gad2, Slc6a1, Slc32a1 |
| 23 | Excitatory Neurons | Camk2a |
| 24 | Excitatory Neurons | Slc17a7 |
| 25 | Inhibitory Neurons | Reln, Gad1, Slc6a1, Slc32a1 |
| 26 | Excitatory Neurons | Grin2a, Camk2a |
| 27 | Excitatory Neurons | Slc17a6, Slc17a7 |
| 28 | Excitatory Neurons | Slc17a7, Gria4 |
| 29 | Excitatory Neurons | Slc17a6 |
| 31 | Excitatory Neurons | Slc17a6 |
| Glial cells | 0 | Oligodendrocyte | Mbp, Mog |
| 2 | Oligodendrocyte | Mbp, Mog, Plp1, Olig1 |
| 3 | Microglia | C1qa, C1qb, C1qc, Tmem119, P2ry12 |
| 15 | Oligodendrocyte | Olig1, Olig2 |
| 21 | Astrocyte | Aldh1l1, Slc1a3 |
| 30 | Astrocyte | Slc1a3 |
| 32 | Microglia | C1qa, C1qb, C1qc, Tmem119, P2ry12 |
| Fibroblasts and Stromal | 11 | Fibroblasts and Stromal | Dcn, Ptpn14 |


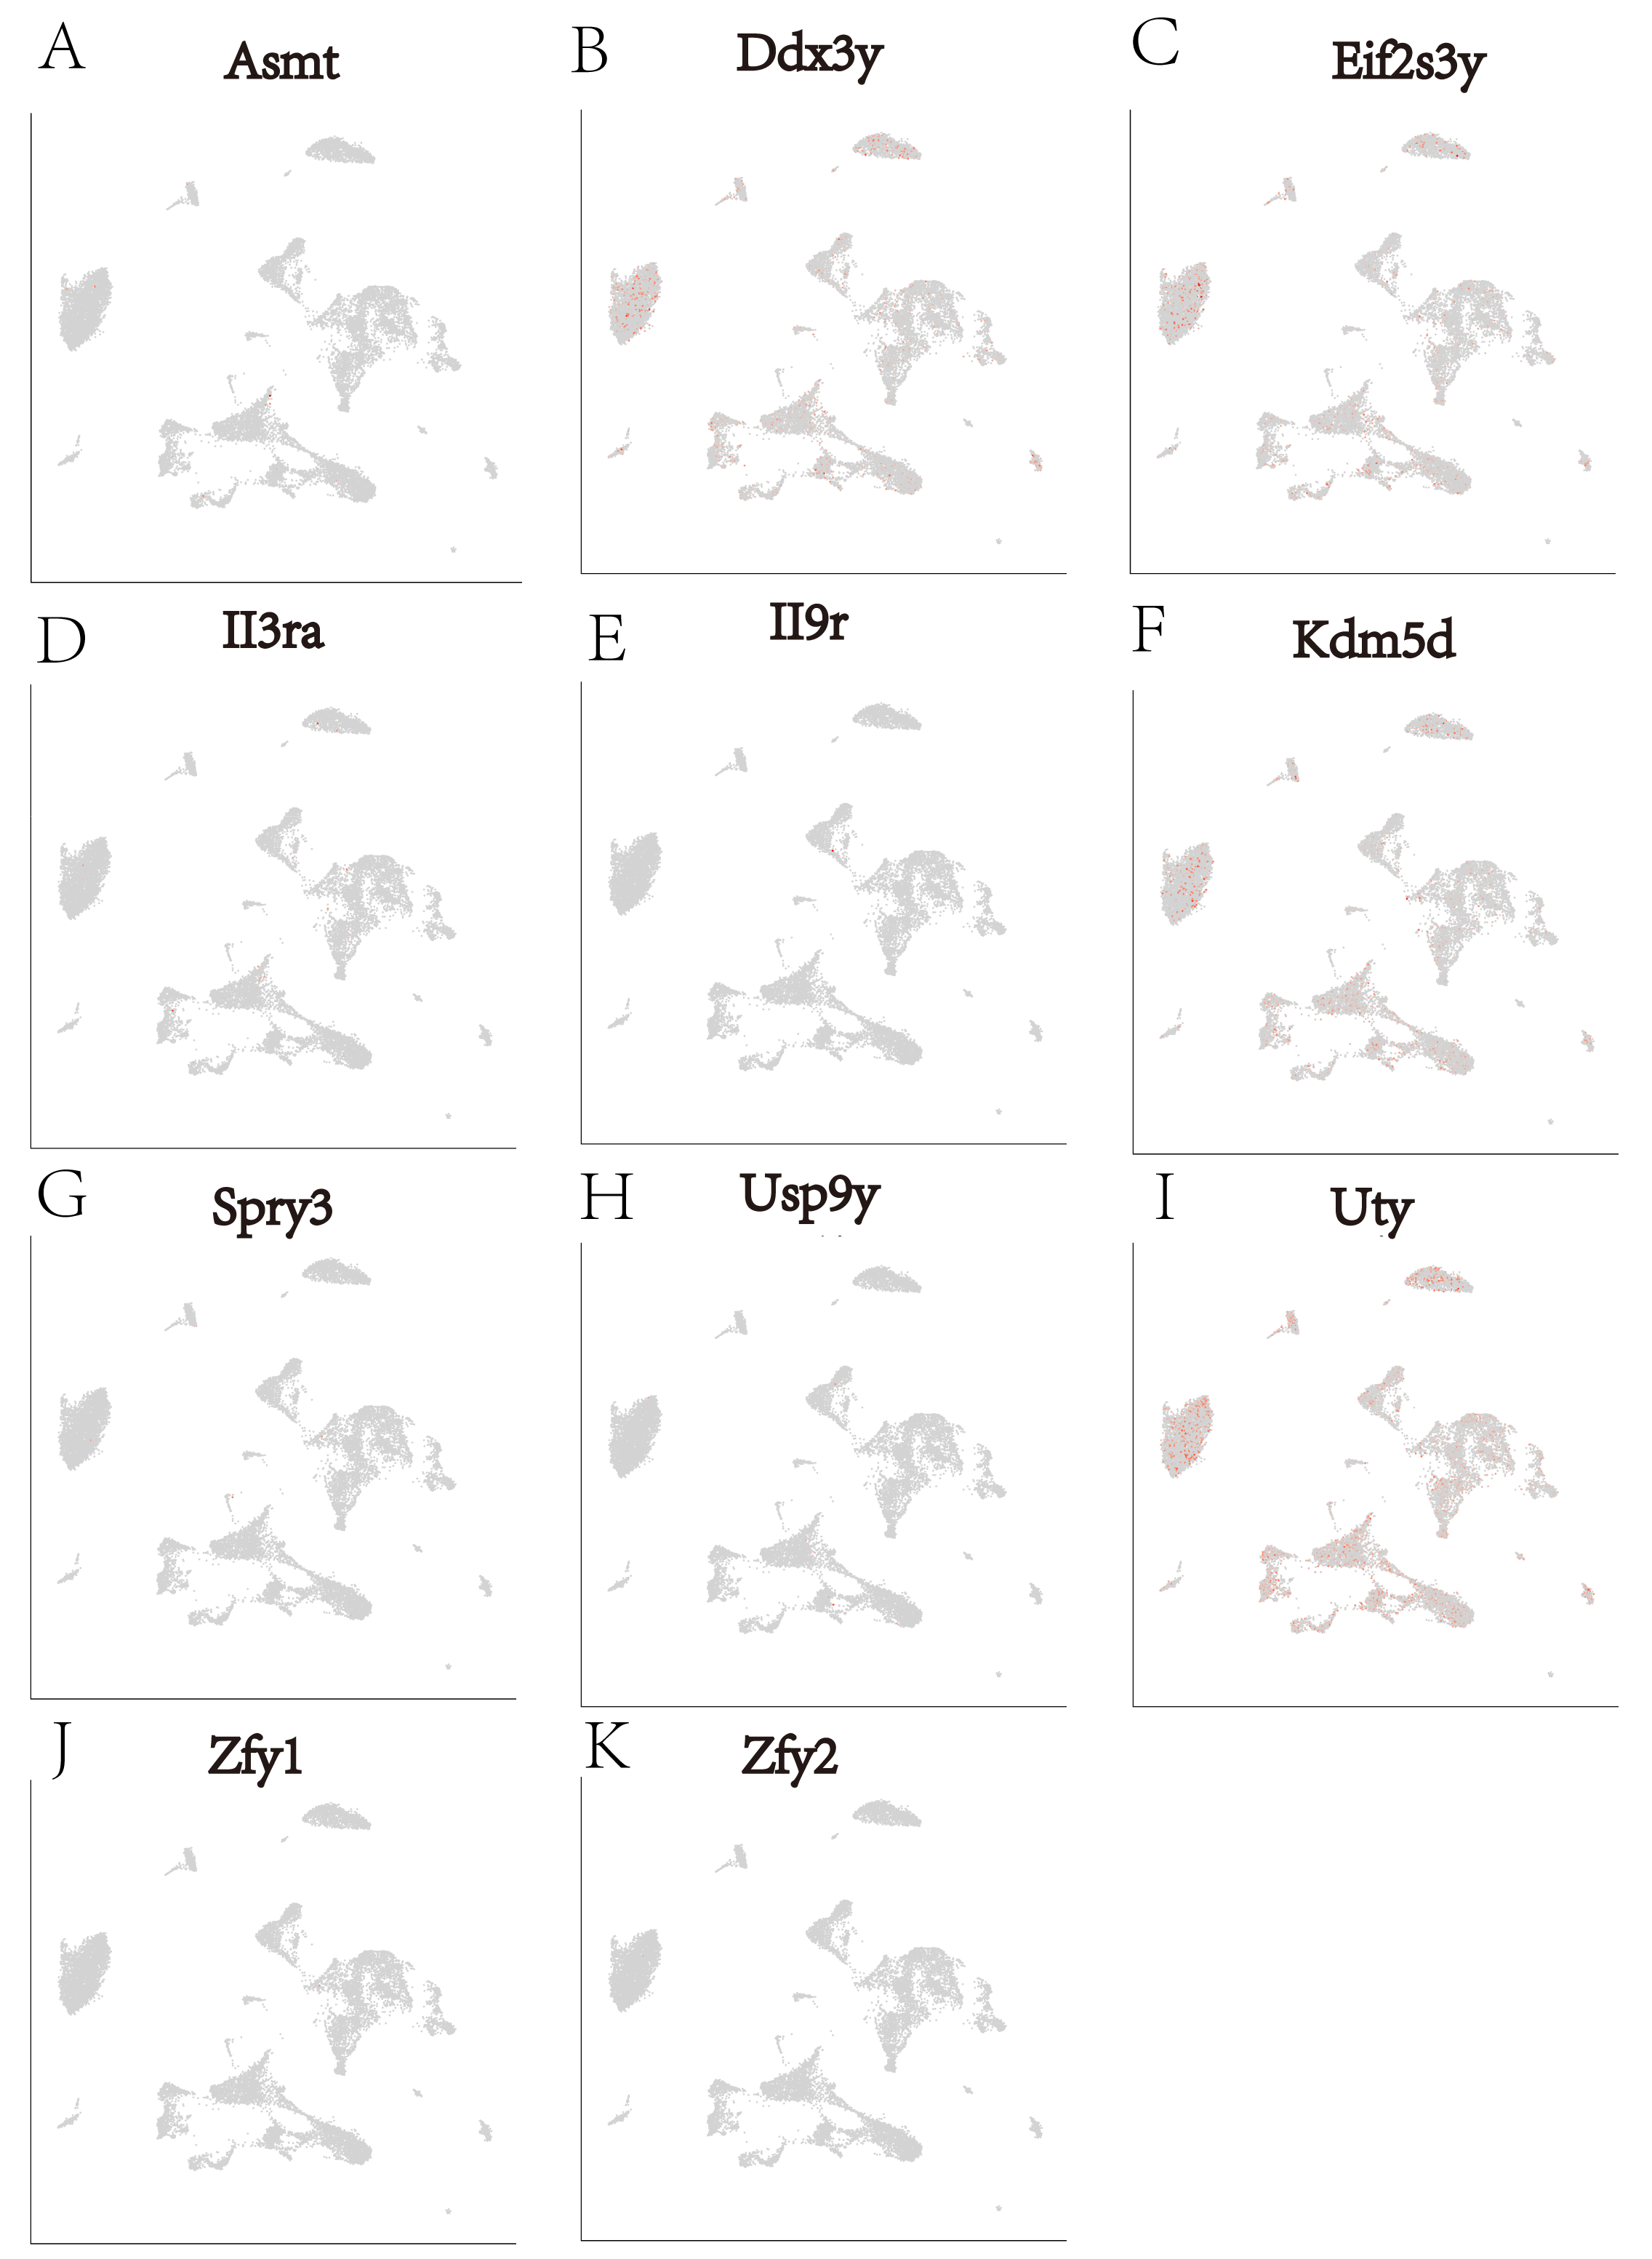


****Figure S1.**** (A–k) Expression of the following genes in brain tissue: DDX3Y, USP9Y, KDM5D, Eif2s3y, Uty, II3ra, II9r, Spry3, Asmt, Zfy1, Zfy2. Red: relatively high expression.
